# Supplementary material for: Novel Insight into the Role of Squalene Epoxidase (SQLE) Gene in Determining Milk Production Traits in Buffalo
Source: MDPI journal article supplement (doi:10.3390/ijms24032436), 2023-01-26
Supplement: s1 [file s1]

**Table S1.** Primer information for the buffalo *SQLE* gene.

| Primer | Sequence (5'-3')                                   | Production Size (bp) |
|--------|----------------------------------------------------|----------------------|
| 1      | F: GACTGTACACATACCTATAA<br>R: TCAAATCTCTGAAGGGATAG | 710                  |
| 2      | F: GGAAACAAGATTTGGAGACC<br>R: TTCACCTTACTGTAACCCTG | 703                  |
| 3      | F: GAACGATAAGGTATGAATAA<br>R: TGAATCTGCAAGAAGGTGTG | 620                  |
| 4      | F: CCTTGCTTGATTCACTCCAG<br>R: TAGGACGAGGTTGCGTGGTG | 665                  |
| 5      | F: ACACCACGCAACCTCGTCCT<br>R: GCCTTCTCCCACCAAAGATG | 499                  |
| 6      | F: ATCTCGGCCTACAAGCGGTG<br>R: CTCCCCTTTCACGCAATCCA | 721                  |
| 7      | F: TTGATGTTTGTCTCCCTGTT<br>R: GTAGCGATAAGACAGCACGA | 599                  |
| 8      | F: TCGTGCTGTCTTATCGCTAC<br>R: CTTAATCAAACCCAGTTCGT | 435                  |
| 9      | F: TCTGACTCTTTGTGACCCTG<br>R: TTATCCTCTCCTTTGCCTTC | 693                  |
| 10     | F: GGATCTTAAAGGATGCTTCA<br>R: ACATCTCTGAGGCTAAGTGG | 411                  |
| 11     | F: CCACTTAGCCTCAGAGATGT<br>R: AAAGGACTTATTGACTTGGA | 435                  |
| 12     | F: TTGTCCCTTGACCAGCAGAT<br>R: TTTAGAAGCAGGAGGAGTAC | 447                  |

**Table S2.** Primer sequences used for qRT-PCR assay and siRNA sequences.

| Genes          | Primer Sequence (5'-3')                                    | Annealing Temperature (°C) | Production Size (bp) |
|----------------|------------------------------------------------------------|----------------------------|----------------------|
| <i>SQLE</i>    | F: GCAGCGCGCATAAGTGTATC<br>R: GAGGAATCAGGCACAGCCTT         | 60                         | 231                  |
| <i>GAPDH</i>   | F: AGGTTGTCTCCTGCGACTTC<br>R: ATTCTCAGTGTGGTGGAGGTG        | 60                         | 263                  |
| <i>PCNA</i>    | F: GAACCTCACCAGCATGTCCAA<br>R: TTCACCAGAAGGCATCTTTACT      | 60                         | 220                  |
| <i>P21</i>     | F: GCCTTCCAGAGGCTCAACTT<br>R: GCTTCGCTATGGTCCTCTCC         | 60                         | 115                  |
| <i>SREBP1</i>  | F: AGTAGCAGCGGTGGAAGT<br>R: GCAGCGGCTCTGGATT               | 58                         | 82                   |
| <i>JAK2</i>    | F: TGAAGAAAACAGGTAATCAGACTGGA<br>R: AACATTTTCTCGCTCAACAGCA | 60                         | 101                  |
| <i>RPS6KB1</i> | F: AAATGCTGCTTCTCGTCT<br>R: GTTCTTCCCAGTTAATATGTCT         | 54                         | 89                   |
| <i>eIF4E</i>   | F: GTGACCTCGATCGTTTTTGG<br>R: TAGTGGTGGAGCCGCTCTTA         | 55                         | 264                  |
| si-SQLE (1103) | F: CCUAUAUUCUGUCAGCCUUTT<br>R: AAGGCUGACAGAAUAUAGGTT       |                            |                      |
| si-SQLE (1843) | F: GCACCGCAGUUUAAAGCAATT<br>R: UUGCUUUAAACUGCGGUGCTT       |                            |                      |
| si-SQLE (1960) | F: CCAAGGAAUUUGAGAGAAUTT<br>R: AUUCUCUCAAUUCUUGGTT         |                            |                      |
| si-SQLE (2031) | F: CCUAGAAGCCUCUCAGAAUTT<br>R: AUUCUGAGAGGCUUCUAGGTT       |                            |                      |
